# Supplementary material
Source: publisher site journal article supplement (https://www.spandidos-publications.com/4817/downloadSupplementary)
Supplement: Supplementary file 1 [file downloadSupplementary]

## Sheet: Table SIV
Table SIV. Correlation between drug z score and the expression of ferroptosis-related genes.
Gene	Drug	Correlation coefficient	P-value
MYB	Chelerythrine	0.656769	1.20911e-08
MYB	Nelarabine	0.586592	8.42623e-07
MYB	Dexrazoxane	0.551267	5.00368e-06
MYB	Palbociclib	0.543736	7.12889e-06
HSPB1	PX-316	-0.53531	1.04876e-05
MYB	Imexon	0.525737	1.60609e-05
MYB	Ifosfamide	0.522677	1.83556e-05
MYB	PX-316	0.5219	1.89846e-05
MYB	XK-469	0.504133	4.01354e-05
MYB	Fenretinide	0.496673	5.42914e-05
MYB	Cyclophosphamide	0.493579	6.14155e-05
DBN1	Selumetinib	-0.477108	0.000116085
DBN1	LDK-378	-0.469618	0.000153438
MYB	Carmustine	0.464581	0.000184441
MYB	Oxaliplatin	0.461721	0.000204493
MYB	Crizotinib	0.455416	0.000255932
CD44	Tamoxifen	-0.453202	0.000276631
HILPDA	Fenretinide	0.45229	0.000285595
MYB	Dimethylaminoparthenolide	0.451588	0.000292674
MYB	Lomustine	0.450712	0.000301725
CD44	Staurosporine	0.447063	0.000342275
CD44	Oxaliplatin	-0.443884	0.00038157
DBN1	Cobimetinib (isomer 1)	-0.442575	0.000398909
CD44	SR16157	-0.441145	0.000418661
MYB	Bendamustine	0.438862	0.000452061
MYB	Hydroxyurea	0.4386	0.000456042
YWHAE	Clofarabine	0.435447	0.000506561
MYB	Erlotinib	-0.433678	0.000537076
YWHAE	Cladribine	0.430694	0.000592344
MYB	By-Product of CUDC-305	0.425232	0.000707017
MYB	Raloxifene	0.421599	0.000794044
DBN1	Dolastatin 10	-0.420894	0.00081203
DBN1	Temsirolimus	0.416016	0.000946747
MYB	Pyrazoloacridine	0.413807	0.00101416
CD44	Fulvestrant	-0.402221	0.00144374
MYB	Idarubicin	0.399563	0.00156282
CD44	By-Product of CUDC-305	-0.397921	0.00164072
MYB	Tamoxifen	0.394692	0.00180415
MYB	Nilotinib	0.392793	0.00190692
HSPB1	Everolimus	0.392454	0.0019258
MYB	8-Chloro-adenosine	0.392201	0.00193997
MYB	Asparaginase	0.391273	0.00199291
MYB	Acrichine	0.389959	0.00207003
HILPDA	Fulvestrant	0.389547	0.00209474
HILPDA	Fostamatinib	0.38949	0.00209817
HSPB1	Bleomycin	0.388266	0.00217327
DBN1	Everolimus	0.386296	0.00229927
CD44	Simvastatin	0.383152	0.00251379
MYB	Batracylin	0.382619	0.00255183
HILPDA	Chlorambucil	0.381952	0.00260023
CD44	Tegafur	-0.375942	0.00307446
HES1	Nelfinavir	-0.375872	0.0030804
CD44	3-Bromopyruvate (acid)	-0.375308	0.00312864
CD44	Elesclomol	-0.375254	0.00313329
MYB	Chlorambucil	0.371141	0.00350681
CD44	Dimethylaminoparthenolide	-0.370057	0.00361162
YWHAE	AP-26113	-0.369423	0.00367418
HILPDA	Raloxifene	0.367645	0.00385476
MYB	Simvastatin	-0.367156	0.00390574
HSPB1	Sonidegib	0.366223	0.00400474
DBN1	5-fluoro deoxy uridine 10mer	0.365387	0.00409536
MYB	Irofulven	-0.36485	0.00415452
MYB	Amonafide	0.362288	0.00444727
MYB	Pipobroman	0.362203	0.00445718
MYB	Melphalan	0.360475	0.00466516
HES1	Nelarabine	0.36046	0.00466704
MYB	Vorinostat	0.359488	0.00478775
HSPB1	Chelerythrine	-0.359398	0.00479909
MYB	Etoposide	0.359069	0.00484063
MYB	Everolimus	-0.357731	0.00501303
CD44	Imatinib	-0.356876	0.00512599
MYB	Nitrogen mustard	0.35644	0.0051844
HSPB1	Eribulin mesilate	-0.3559	0.00525761
HILPDA	1st Precursor Intermediate to TDP 665759	0.354757	0.00541561
HES1	Dasatinib	-0.35294	0.00567535
MYB	Fostamatinib	0.351115	0.00594715
DBN1	Digoxin	0.35101	0.00596306
HSPB1	Temsirolimus	0.350502	0.00604094
DBN1	Crizotinib	-0.350114	0.00610102
MYB	3-Bromopyruvate (acid)	0.349886	0.00613649
HILPDA	Nelfinavir	0.349579	0.00618462
SLC11A2	Docetaxel	-0.348892	0.00629357
HILPDA	7-Hydroxystaurosporine	0.348711	0.00632246
SLC11A2	Paclitaxel	-0.347859	0.00646045
CD44	LDK-378	-0.347738	0.00648032
MYB	LDK-378	0.34597	0.00677576
DBN1	Rapamycin	0.34483	0.00697245
IFNG	Decitabine	0.343024	0.00729444
DBN1	Bleomycin	0.340783	0.00771178
MYB	Uracil mustard	0.340477	0.00777037
HES1	kahalide f	0.340381	0.00778891
MYB	LY-294002	-0.339492	0.00796161
MYB	Cytarabine	0.339176	0.00802388
DBN1	Tamoxifen	-0.336865	0.00849188
IFNG	Thiotepa	0.336081	0.00865588
MYB	BN-2629	0.335466	0.0087866
MYB	Parthenolide	0.335424	0.00879539
CD44	8-Chloro-adenosine	-0.334542	0.00898591
HSPB1	LY-294002	0.334321	0.0090342
MYB	Perifosine	0.332973	0.00933383
YWHAE	Gemcitabine	0.332777	0.00937799
HSPB1	Itraconazole	0.332543	0.00943111
CD44	Dexrazoxane	-0.332263	0.00949481
CD44	Ixabepilone	-0.33224	0.00950012
MYB	Ixabepilone	0.331325	0.00971162
DBN1	Bafetinib	-0.33049	0.0099079
HSPB1	Lenvatinib	0.330448	0.00991805
MYB	Staurosporine	-0.330303	0.00995237
HSPB1	Vinblastine	-0.329355	0.0101805
MYB	Arsenic trioxide	0.328575	0.0103714
HSPB1	bisacodyl, active ingredient of viraplex	0.328441	0.0104048
HSPB1	Salinomycin	0.327742	0.0105789
MYB	Imatinib	0.32739	0.0106677
CD44	Raloxifene	-0.325565	0.0111382
HILPDA	Uracil mustard	0.325451	0.011168
DBN1	Gemcitabine	0.324874	0.0113209
IFNG	Pipobroman	0.32383	0.011602
IFNG	Triethylenemelamine	0.323442	0.0117079
HSPB1	Pazopanib	0.322407	0.0119948
HILPDA	Chelerythrine	0.322057	0.012093
DBN1	Erlotinib	0.321659	0.0122058
CD44	Celecoxib	-0.321456	0.0122635
SLC11A2	Vorinostat	0.320373	0.0125759
HILPDA	SR16157	0.319575	0.0128107
MYB	AT-13387	0.318804	0.0130409
HSPB1	Rapamycin	0.318364	0.013174
DBN1	Trametinib	-0.318031	0.0132752
HES1	AP-26113	-0.317039	0.0135813
MYB	Teniposide	0.316873	0.0136331
DBN1	Lenvatinib	0.316739	0.0136753
YWHAE	Cytarabine	0.316252	0.0138285
HILPDA	Ixabepilone	0.315925	0.0139325
YWHAE	Floxuridine	0.315614	0.0140316
DBN1	Fludarabine	0.315289	0.0141364
HES1	Vemurafenib	0.31481	0.0142915
MYB	Dasatinib	-0.314712	0.0143234
HSPB1	Olaparib	0.312121	0.0151902
MYB	Fluphenazine	0.311403	0.0154383
MYB	Daunorubicin	0.311056	0.0155596
DBN1	Palbociclib	-0.310986	0.0155839
SLC11A2	Dasatinib	-0.31033	0.0158155
DBN1	PD-98059	-0.309749	0.0160228
SLC11A2	Vinorelbine	-0.309052	0.0162748
YWHAE	Fludarabine	0.308372	0.0165242
IFNG	Mitomycin	0.308275	0.01656
HSPB1	Zoledronate	0.307898	0.0166997
HSPB1	Sunitinib	-0.307227	0.016951
HSPB1	Idelalisib	0.306764	0.017126
HILPDA	XK-469	0.305787	0.017501
MYB	Dromostanolone Propionate	0.305693	0.0175373
SLC11A2	Nelarabine	0.305285	0.0176963
HILPDA	Vismodegib	0.304809	0.0178831
HILPDA	Nelarabine	0.304768	0.0178994
DBN1	Ibrutinib	0.303731	0.018313
HILPDA	Hydroxyurea	0.303617	0.0183588
HILPDA	Tamoxifen	0.302482	0.0188216
CD44	Isotretinoin	-0.302211	0.0189335
MYB	Pipamperone	0.302135	0.018965
HSPB1	Acetalax	0.301774	0.019115
MYB	Lenvatinib	-0.301665	0.0191608
MYB	Dolastatin 10	0.30043	0.0196833
DBN1	Denileukin Diftitox Ontak	-0.298984	0.0203108
HSPB1	By-Product of CUDC-305	-0.298036	0.0207309
MYB	Thiotepa	0.297867	0.0208068
YWHAE	LMP776	0.297562	0.0209442
CD44	Fluorouracil	-0.296275	0.0215315
DBN1	Entinostat	-0.296188	0.0215717
HSPB1	Palbociclib	-0.295976	0.0216702
YWHAE	Vandetanib	-0.295055	0.0221016
MYB	7-Hydroxystaurosporine	0.294934	0.0221587
HES1	Staurosporine	-0.294896	0.0221767
HILPDA	Carboplatin	0.294859	0.0221942
HSPB1	SR16157	0.294701	0.0222693
HES1	Megestrol acetate	-0.29461	0.0223125
MYB	RH1	0.294135	0.0225395
CD44	Nilotinib	-0.293458	0.0228669
IFNG	Etoposide	0.292949	0.0231154
HSPB1	(+)-JQ1	0.292135	0.0235176
DBN1	Floxuridine	0.290294	0.0244492
MYB	Triethylenemelamine	0.290101	0.0245484
HSPB1	Alvespimycin	-0.289352	0.0249377
CD44	Arsenic trioxide	-0.289247	0.0249926
MYB	Valrubicin	0.288868	0.0251916
DBN1	Dabrafenib	-0.2874	0.0259765
YWHAE	Denileukin Diftitox Ontak	-0.287387	0.0259836
SLC11A2	Chelerythrine	0.286525	0.0264537
HILPDA	8-Chloro-adenosine	0.285908	0.0267948
HSPB1	geldanamycin analog	-0.285778	0.0268668
DBN1	Cisplatin	0.285598	0.0269676
MYB	Ibrutinib	-0.285225	0.0271765
HSPB1	Abiraterone	0.285062	0.0272682
HILPDA	Nitrogen mustard	0.285058	0.0272702
SLC11A2	Zoledronate	-0.285042	0.0272792
YWHAE	Depsipeptide	-0.284323	0.0276874
YWHAE	Bosutinib	-0.283281	0.0282879
DBN1	Paclitaxel	-0.283095	0.0283961
SLC11A2	Dabrafenib	0.282906	0.0285069
CD44	Midostaurin	0.281441	0.0293753
MYB	Belinostat	0.281406	0.0293959
IFNG	Raltitrexed	0.281251	0.0294897
IFNG	Cisplatin	0.281091	0.0295859
SLC11A2	XL-147	0.281072	0.0295976
CD44	Nelfinavir	-0.278802	0.030995
CD44	Acetalax	-0.278686	0.0310679
HILPDA	Crizotinib	0.278384	0.0312588
HSPB1	Paclitaxel	-0.278309	0.0313061
DBN1	Sonidegib	0.278042	0.0314755
YWHAE	Celecoxib	-0.277591	0.031763
CD44	Clofarabine	0.277401	0.031885
CD44	Lomustine	-0.277134	0.0320572
CD44	Nitrogen mustard	-0.276823	0.0322585
YWHAE	Nelarabine	0.276272	0.032618
MYB	Bleomycin	-0.275098	0.0333944
MYB	kahalide f	-0.274902	0.0335257
IFNG	Valrubicin	0.274883	0.0335383
HILPDA	Melphalan	0.274846	0.0335633
HSPB1	Perifosine	-0.273633	0.0343854
CD44	Parthenolide	-0.272857	0.0349199
DBN1	Vemurafenib	-0.272714	0.0350195
DBN1	geldanamycin analog	-0.271483	0.0358835
MYB	Vandetanib	-0.271001	0.0362264
YWHAE	Homoharringtonine	-0.270416	0.036647
YWHAE	Dolastatin 10	-0.270343	0.0366993
HILPDA	Perifosine	0.270237	0.0367761
SLC11A2	Hypothemycin	0.269816	0.0370821
IFNG	BEN	0.269525	0.0372944
CD44	AFP464	-0.269199	0.0375339
MYB	Zoledronate	-0.269156	0.037566
HSPB1	Gemcitabine	0.268204	0.0382725
DBN1	Vinorelbine	-0.268073	0.0383707
DBN1	Hypothemycin	-0.267612	0.0387175
MYB	Cladribine	0.267573	0.0387468
MYB	Sonidegib	-0.267481	0.0388168
YWHAE	Irinotecan	0.267372	0.0388992
MYB	Bafetinib	0.267154	0.0390647
CD44	Ifosfamide	-0.266883	0.0392715
DBN1	Vinblastine	-0.265888	0.040038
IFNG	Teniposide	0.265862	0.040058
HILPDA	Curcumin	0.264267	0.041313
HILPDA	Seliciclib	0.262596	0.0426632
HSPB1	Dolastatin 10	-0.262594	0.0426643
CD44	Irofulven	0.26231	0.0428972
HILPDA	Carmustine	0.262113	0.0430593
CD44	Decitabine	-0.261945	0.0431985
YWHAE	Imatinib	-0.261861	0.0432675
MYB	Hypothemycin	0.261614	0.0434729
MYB	Vinblastine	0.261284	0.0437476
MYB	Dexamethasone Decadron	0.261263	0.0437653
IFNG	Nitrogen mustard	0.260499	0.0444076
CD44	Dolastatin 10	-0.260435	0.0444619
MYB	Axitinib	0.260231	0.0446348
DBN1	Eribulin mesilate	-0.260187	0.044672
CD44	Salinomycin	-0.259421	0.0453274
MYB	SR16157	0.25906	0.0456382
DBN1	Perifosine	-0.25891	0.0457687
YWHAE	Methotrexate	0.258865	0.0458075
HES1	Fostamatinib	-0.258457	0.0461624
MYB	Epirubicin	0.258147	0.0464334
HILPDA	Dexrazoxane	0.258132	0.0464471
SLC11A2	Parthenolide	0.25782	0.0467214
IFNG	Tegafur	0.257389	0.0471024
IFNG	LMP-400	0.256794	0.047633
HILPDA	Arsenic trioxide	0.256782	0.0476445
MYB	Methotrexate	0.256122	0.0482384
HSPB1	Docetaxel	-0.25573	0.0485947
MYB	Benzimate	0.254835	0.0494148
HSPB1	Vinorelbine	-0.254816	0.0494329
